# Supplementary material for: Hierarchical social modularity in gorillas
Source: PubMed Central journal article supplement (PMC6650716; doi:10.1098/rspb.2019.0681), 2019-07-10
Supplement: rspb20190681_review_history.pdf [file rspb20190681_review_history.pdf]

## Hierarchical social modularity in gorillas

Robin E. Morrison, Milou Groenenberg, Thomas Breuer, Marie L. Manguette and Peter D. Walsh

### Article citation details

*Proc. R. Soc. B* **286**: 20190681.

<http://dx.doi.org/10.1098/rspb.2019.0681>

### Review timeline

Original submission: 22 March 2019

1st revised submission: 9 May 2019

2nd revised submission: 20 June 2019

Final acceptance: 20 June 2019

Note: Reports are unedited and appear as submitted by the referee. The review history appears in chronological order.

## Review History

### RSPB-2019-0681.R0 (Original submission)

#### Review form: Reviewer 1

##### Recommendation

Major revision is needed (please make suggestions in comments)

##### Scientific importance: Is the manuscript an original and important contribution to its field?

Acceptable

##### General interest: Is the paper of sufficient general interest?

Good

##### Quality of the paper: Is the overall quality of the paper suitable?

Acceptable

##### Is the length of the paper justified?

Yes

**Should the paper be seen by a specialist statistical reviewer?**

Yes

**Do you have any concerns about statistical analyses in this paper? If so, please specify them explicitly in your report.**

Yes

**It is a condition of publication that authors make their supporting data, code and materials available - either as supplementary material or hosted in an external repository. Please rate, if applicable, the supporting data on the following criteria.**

**Is it accessible?**

Yes

**Is it clear?**

Yes

**Is it adequate?**

Yes

**Do you have any ethical concerns with this paper?**

No

### **Comments to the Author**

This manuscript empirically tests the idea that western gorillas, like humans, some other primates (e.g. hamadryas baboons, geladas) elephants, and whales, live in a hierarchically nested, sometimes-kin-structured social organization. It addresses a very interesting question about these understudied animals, and makes good use of the extensive bai data from multiple field sites.

The introduction to the paper is extremely well written. It is clear and concise and is a pleasure to read. I have only two comments/questions about the introduction. First, I am unclear on what the justification is for claiming that HSM is 'uniquely human' if we already know that it occurs in other primates, whales, and elephants. Is this claim perhaps outdated, written before we knew that it occurred in these other taxa? Please clarify. The answer to this is important, as I think it fundamentally affects whether this paper is best suited for Proceedings B, or some other journal. Second, I would suggest adding another sentence or two on western gorilla dispersal/social structure. For example, the term 'solitaries' comes up in the methods, but the authors did not clarify earlier that many adult males live alone. It doesn't need to be much, but for the very general readership of Proceedings B, it's best not to make any assumptions about what people do or do not know about gorillas.

Beyond the introduction, the paper needs extensive editing to make the methods and results intelligible to readers in a broad range of specialties. Relatively few Proceedings B readers will have much, if any, familiarity with the modeling framework the authors have adopted, and it is not currently explained in a manner that makes it accessible to anyone who is not already intimately familiar with the analysis methods. In general, the authors need to find a way to explain the statistical modeling in a way that tells us about the biological significance. E.g., what are bifurcation heights telling us? What about bifurcation differences? Are the SR and BP association indices simply complimentary ways of analyzing the data, or is there some specific purpose to using both? What are changes in gradients/knots telling us? Those are just a few examples. The way the statistical methods – and to some degree the results – are written, they are inaccessible to anyone who does not do exactly this sort of work themselves.

I think at least part of this could be remedied by including more basic description. While I sympathize with the authors' desire to be concise, what this functionally means is that I still don't have a clear idea of what the authors are proposing this hierarchical structure looks like. How big are these second-tier associations that the authors are newly describing? How closely related, on average, are the males who make up the members of a group at this tier? What might tie together the males who are members of a group at this tier for the Mbeli population, if not genetic kinship? It doesn't help much to say that these are equivalent to e.g. elephant clans or baboon gangs if we don't know what those are (and again, most people won't). The figures help only a little, if at all, since they seem to be missing captions, and a lot of the terms used in them are never really defined. As written, the biology has gotten lost underneath the numbers.

I would be happy to read a revised version of this article and offer more specific comments once I have a clearer idea of what was done and what was found. I could not agree with the authors more that an unquestioned assumption that chimpanzees are always the best model for understanding human evolution, based only on their genetic relatedness, is extremely problematic. We need more studies like these to clarify where humans do, and do not, overlap with the many interesting characteristics of great ape social behavior.

## Review form: Reviewer 2 (Noah Snyder-Mackler)

### **Recommendation**

Accept with minor revision (please list in comments)

**Scientific importance: Is the manuscript an original and important contribution to its field?**

Good

**General interest: Is the paper of sufficient general interest?**

Good

**Quality of the paper: Is the overall quality of the paper suitable?**

Good

**Is the length of the paper justified?**

Yes

**Should the paper be seen by a specialist statistical reviewer?**

Yes

**Do you have any concerns about statistical analyses in this paper? If so, please specify them explicitly in your report.**

Yes

**It is a condition of publication that authors make their supporting data, code and materials available - either as supplementary material or hosted in an external repository. Please rate, if applicable, the supporting data on the following criteria.**

**Is it accessible?**

Yes

**Is it clear?**

Yes

**Is it adequate?**

Yes

**Do you have any ethical concerns with this paper?**

No

### **Comments to the Author**

In this manuscript the authors take a network-based approach to classify the hierarchical structure of western lowland gorillas. Overall, the manuscript is well written and the analyses relatively clearly presented. The authors also take care to place their work in the broader literature, and fill an important gap in our knowledge of the evolution of hierarchical social modularity (HSM) in apes (and therefore humans). Given the sophisticated approach and thorough background/context, this should be of broad interest to the readers of Proceedings B. I only have a few comments for the authors that they should address in any resubmission:

1. Overall, the description of the network methods are short and filled with jargon. It would be useful for the authors to clearly state what each approach brings to the table and, without using jargon, describe what each method does. For instance, the different clustering approaches in lines 100-110 could be explained more clearly. What does the "cluster\_resolution" algorithm do? What do "multiple peaks in modularity" mean for the social structure of gorillas? Some, but not all of this detail, is present in the supplementary methods.
2. In the main text, the authors should clarify what each node in their network represents. In the main text it is unclear if each node is an individual silverback (or solitary male), or if each node in the network is a "group" or "solitary". I had to go to the supplementary tables to figure out that it was "group" & "solitary". For instance, in lines 130-132 they mention "silverbacks" and not "groups". Which is it? Please be consistent.
3. Lines 121-124: There is too little detail in the main methods here about the kinship coefficients and models. These details are in the SI, but should be moved here. For instance, your binarization of "related" ( $r > 0.2$ ) vs. "unrelated" ( $r < 0.2$ ), should be clearly explained in the main text. The relatedness analysis/results in Lines 193-195 are unclear. What is the predictor and what is the outcome variable? What is the "membership in the higher tier modules" and what about lower tiers?
4. Lines 149-152 (and elsewhere). I don't think that Kendall's rank correlation is an appropriate statistic here since the two vectors of association indices are not independent. A better approach would be to use a Mantel's test, which accounts for the interdependence of association indices in a matrix.
5. It would be useful to include comparisons to other primates with modular societies, like golden snub-nosed monkeys, geladas (the g3 level is similar to gelada "teams"), and uakaris.
6. This is probably due to the manuscript submission system, but there were no figure captions in the manuscript or online. This made it difficult to interpret the figures.

## Decision letter (RSPB-2019-0681.R0)

26-Apr-2019

Dear Ms Morrison:

Your manuscript has now been peer reviewed and the reviews have been assessed by an Associate Editor. The reviewers' comments (not including confidential comments to the Editor) and the comments from the Associate Editor are included at the end of this email for your reference. As you will see, the reviewers and the Editors have raised some concerns with your manuscript and we would like to invite you to revise your manuscript to address them. In particular, please focus on clarifying your statistical approach, as outlined by both reviewers, and how your paper fits in to the broader literature on hierarchical social modularity across animal species.

We do not allow multiple rounds of revision so we urge you to make every effort to fully address all of the comments at this stage. If deemed necessary by the Associate Editor, your manuscript will be sent back to one or more of the original reviewers for assessment. If the original reviewers are not available we may invite new reviewers. Please note that we cannot guarantee eventual acceptance of your manuscript at this stage.

To submit your revision please log into <http://mc.manuscriptcentral.com/prsb> and enter your Author Centre, where you will find your manuscript title listed under "Manuscripts with Decisions." Under "Actions", click on "Create a Revision". Your manuscript number has been appended to denote a revision.

When submitting your revision please upload a file under "Response to Referees" - in the "File Upload" section. This should document, point by point, how you have responded to the reviewers' and Editors' comments, and the adjustments you have made to the manuscript. We require a copy of the manuscript with revisions made since the previous version marked as 'tracked changes' to be included in the 'response to referees' document.

Your main manuscript should be submitted as a text file (doc, txt, rtf or tex), not a PDF. Your figures should be submitted as separate files and not included within the main manuscript file.

When revising your manuscript you should also ensure that it adheres to our editorial policies (<https://royalsociety.org/journals/ethics-policies/>). You should pay particular attention to the following:

### Research ethics:

If your study contains research on humans please ensure that you detail in the methods section whether you obtained ethical approval from your local research ethics committee and gained informed consent to participate from each of the participants.

### Use of animals and field studies:

If your study uses animals please include details in the methods section of any approval and licences given to carry out the study and include full details of how animal welfare standards were ensured. Field studies should be conducted in accordance with local legislation; please include details of the appropriate permission and licences that you obtained to carry out the field work.

### Data accessibility and data citation:

It is a condition of publication that you make available the data and research materials supporting the results in the article. Datasets should be deposited in an appropriate publicly available repository and details of the associated accession number, link or DOI to the datasets must be included in the Data Accessibility section of the article (<https://royalsociety.org/journals/ethics-policies/data-sharing-mining/>). Reference(s) to datasets should also be included in the reference list of the article with DOIs (where available).

In order to ensure effective and robust dissemination and appropriate credit to authors the dataset(s) used should also be fully cited and listed in the references.

If you wish to submit your data to Dryad (<http://datadryad.org/>) and have not already done so you can submit your data via this link [http://datadryad.org/submit?journalID=RSPB&manu=\(Document not available\)](http://datadryad.org/submit?journalID=RSPB&manu=(Document not available)), which will take you to your unique entry in the Dryad repository.

If you have already submitted your data to dryad you can make any necessary revisions to your dataset by following the above link.

For more information please see our open data policy <http://royalsocietypublishing.org/data-sharing>.

Electronic supplementary material:

All supplementary materials accompanying an accepted article will be treated as in their final form. They will be published alongside the paper on the journal website and posted on the online figshare repository. Files on figshare will be made available approximately one week before the accompanying article so that the supplementary material can be attributed a unique DOI. Please try to submit all supplementary material as a single file.

Online supplementary material will also carry the title and description provided during submission, so please ensure these are accurate and informative. Note that the Royal Society will not edit or typeset supplementary material and it will be hosted as provided. Please ensure that the supplementary material includes the paper details (authors, title, journal name, article DOI). Your article DOI will be 10.1098/rspb.[paper ID in form xxxx.xxxx e.g. 10.1098/rspb.2016.0049].

Please submit a copy of your revised paper within three weeks. If we do not hear from you within this time your manuscript will be rejected. If you are unable to meet this deadline please let us know as soon as possible, as we may be able to grant a short extension.

Thank you for submitting your manuscript to Proceedings B; we look forward to receiving your revision. If you have any questions at all, please do not hesitate to get in touch.

Best wishes,

Prof Sarah F Brosnan  
Editor, Proceedings B  
mailto: [proceedingsb@royalsociety.org](mailto:proceedingsb@royalsociety.org)

Associate Editor  
Comments to Author:

I have been fortunate to receive reviews of your article from two experts in the field. Both reviewers reported that your study was strong and should be of interest to a broad audience - ideal for the readership of this journal. I agree. However, both reviewers also requested that you

provide greater clarity in your description of your analytical approach and your interpretation of them. I agree that this will enhance your article and make it more accessible to a wide readership and that doing so will make it a stronger contribution to this journal.

Reviewer(s)' Comments to Author:

Referee: 1

Comments to the Author(s)

This manuscript empirically tests the idea that western gorillas, like humans, some other primates (e.g. hamadryas baboons, geladas) elephants, and whales, live in a hierarchically nested, sometimes-kin-structured social organization. It addresses a very interesting question about these understudied animals, and makes good use of the extensive bai data from multiple field sites.

The introduction to the paper is extremely well written. It is clear and concise and is a pleasure to read. I have only two comments/questions about the introduction. First, I am unclear on what the justification is for claiming that HSM is 'uniquely human' if we already know that it occurs in other primates, whales, and elephants. Is this claim perhaps outdated, written before we knew that it occurred in these other taxa? Please clarify. The answer to this is important, as I think it fundamentally affects whether this paper is best suited for Proceedings B, or some other journal. Second, I would suggest adding another sentence or two on western gorilla dispersal/social structure. For example, the term 'solitaries' comes up in the methods, but the authors did not clarify earlier that many adult males live alone. It doesn't need to be much, but for the very general readership of Proceedings B, it's best not to make any assumptions about what people do or do not know about gorillas.

Beyond the introduction, the paper needs extensive editing to make the methods and results intelligible to readers in a broad range of specialties. Relatively few Proceedings B readers will have much, if any, familiarity with the modeling framework the authors have adopted, and it is not currently explained in a manner that makes it accessible to anyone who is not already intimately familiar with the analysis methods. In general, the authors need to find a way to explain the statistical modeling in a way that tells us about the biological significance. E.g., what are bifurcation heights telling us? What about bifurcation differences? Are the SR and BP association indices simply complimentary ways of analyzing the data, or is there some specific purpose to using both? What are changes in gradients/knots telling us? Those are just a few examples. The way the statistical methods – and to some degree the results – are written, they are inaccessible to anyone who does not do exactly this sort of work themselves.

I think at least part of this could be remedied by including more basic description. While I sympathize with the authors' desire to be concise, what this functionally means is that I still don't have a clear idea of what the authors are proposing this hierarchical structure looks like. How big are these second-tier associations that the authors are newly describing? How closely related, on average, are the males who make up the members of a group at this tier? What might tie together the males who are members of a group at this tier for the Mbeli population, if not genetic kinship? It doesn't help much to say that these are equivalent to e.g. elephant clans or baboon gangs if we don't know what those are (and again, most people won't). The figures help only a little, if at all, since they seem to be missing captions, and a lot of the terms used in them are never really defined. As written, the biology has gotten lost underneath the numbers.

I would be happy to read a revised version of this article and offer more specific comments once I have a clearer idea of what was done and what was found. I could not agree with the authors

more that an unquestioned assumption that chimpanzees are always the best model for understanding human evolution, based only on their genetic relatedness, is extremely problematic. We need more studies like these to clarify where humans do, and do not, overlap with the many interesting characteristics of great ape social behavior.

Referee: 2

#### Comments to the Author(s)

In this manuscript the authors take a network-based approach to classify the hierarchical structure of western lowland gorillas. Overall, the manuscript is well written and the analyses relatively clearly presented. The authors also take care to place their work in the broader literature, and fill an important gap in our knowledge of the evolution of hierarchical social modularity (HSM) in apes (and therefore humans). Given the sophisticated approach and thorough background/context, this should be of broad interest to the readers of Proceedings B. I only have a few comments for the authors that they should address in any resubmission:

1. Overall, the description of the network methods are short and filled with jargon. It would be useful for the authors to clearly state what each approach brings to the table and, without using jargon, describe what each method does. For instance, the different clustering approaches in lines 100-110 could be explained more clearly. What does the “cluster\_resolution” algorithm do? What do “multiple peaks in modularity” mean for the social structure of gorillas? Some, but not all of this detail, is present in the supplementary methods.
2. In the main text, the authors should clarify what each node in their network represents. In the main text it is unclear if each node is an individual silverback (or solitary male), or if each node in the network is a “group” or “solitary”. I had to go to the supplementary tables to figure out that it was “group” & “solitary”. For instance, in lines 130-132 they mention “silverbacks” and not “groups”. Which is it? Please be consistent.
3. Lines 121-124: There is too little detail in the main methods here about the kinship coefficients and models. These details are in the SI, but should be moved here. For instance, your binarization of “related” ( $r > 0.2$ ) vs. “unrelated” ( $r < 0.2$ ), should be clearly explained in the main text. The relatedness analysis/results in Lines 193-195 are unclear. What is the predictor and what is the outcome variable? What is the “membership in the higher tier modules” and what about lower tiers?
4. Lines 149-152 (and elsewhere). I don’t think that Kendall’s rank correlation is an appropriate statistic here since the two vectors of association indices are not independent. A better approach would be to use a Mantel’s test, which accounts for the interdependence of association indices in a matrix.
5. It would be useful to include comparisons to other primates with modular societies, like golden snub-nosed monkeys, geladas (the g3 level is similar to gelada “teams”), and uakaris.
6. This is probably due to the manuscript submission system, but there were no figure captions in the manuscript or online. This made it difficult to interpret the figures.

## Author's Response to Decision Letter for (RSPB-2019-0681.R0)

See Appendix A.

# RSPB-2019-0681.R1 (Revision)

## Review form: Reviewer 1

### Recommendation

Accept with minor revision (please list in comments)

**Scientific importance: Is the manuscript an original and important contribution to its field?**

Good

**General interest: Is the paper of sufficient general interest?**

Excellent

**Quality of the paper: Is the overall quality of the paper suitable?**

Excellent

**Is the length of the paper justified?**

Yes

**Should the paper be seen by a specialist statistical reviewer?**

Yes

**Do you have any concerns about statistical analyses in this paper? If so, please specify them explicitly in your report.**

Yes

**It is a condition of publication that authors make their supporting data, code and materials available - either as supplementary material or hosted in an external repository. Please rate, if applicable, the supporting data on the following criteria.**

**Is it accessible?**

Yes

**Is it clear?**

Yes

**Is it adequate?**

Yes

**Do you have any ethical concerns with this paper?**

No

### Comments to the Author

The authors have done a reasonably satisfactory job of addressing both my concerns, and the concerns of reviewer #2. Their clarifications do help, though I think it would be useful to move some of the information in the supplementary materials to the main text – I am thinking especially of Figure S2 and its accompanying information, which are an important part of the reason this paper is of broad interest.

If the authors are given another chance to revise, then I would also encourage them to work on clarifying their figure captions. These are still lacking much, if any, biology, and largely do not

address the all-important question of what the figure means. Thanks to the clarifications in the text it is now easier to figure out, but a one-sentence description of the biology in each of their figure captions would go a long way. More specific axis titles might also help—e.g. distance from what? Probability of what? It should not be necessary to hunt through the text to figure this out.

As I mentioned in my comments to the editor during the first round of reviews, I believe that this paper should also be evaluated by someone with greater expertise in the statistical techniques the authors are using. If reviewer #2 has such expertise, wonderful, but I myself do not feel qualified to say with any authority that the clustering and network modularity analyses were handled appropriately.

That said, this is an interesting paper with important ramifications for our understanding of a phenomenon—HSM—that has received much attention in the cognition and evolution literatures. I thus feel that Proceedings B is an appropriate home for it, and would recommend acceptance.

## Review form: Reviewer 2 (Noah Snyder-Mackler)

### **Recommendation**

Accept as is

### **Scientific importance: Is the manuscript an original and important contribution to its field?**

Good

### **General interest: Is the paper of sufficient general interest?**

Acceptable

### **Quality of the paper: Is the overall quality of the paper suitable?**

Good

### **Is the length of the paper justified?**

Yes

### **Should the paper be seen by a specialist statistical reviewer?**

No

### **Do you have any concerns about statistical analyses in this paper? If so, please specify them explicitly in your report.**

No

**It is a condition of publication that authors make their supporting data, code and materials available - either as supplementary material or hosted in an external repository. Please rate, if applicable, the supporting data on the following criteria.**

#### **Is it accessible?**

Yes

#### **Is it clear?**

Yes

#### **Is it adequate?**

No

**Do you have any ethical concerns with this paper?**

No

**Comments to the Author**

The authors have thoughtfully revised the manuscript and I have no further comments.

**Decision letter (RSPB-2019-0681.R1)**

14-Jun-2019

Dear Ms Morrison

I am pleased to inform you that your Review manuscript RSPB-2019-0681.R1 entitled "Hierarchical Social Modularity in Gorillas" has been accepted for publication in Proceedings B, pending some minor revisions. In particular, please consider moving the supplemental information Reviewer 1 highlights to the main body of your paper, clarify your Figure captions as per the reviewer's comments, and make your R code accessible. You can find the additional specific requests in the reviewers' and AE's comments below. Because the schedule for publication is very tight, it is a condition of publication that you submit the revised version of your manuscript within 7 days. If you do not think you will be able to meet this date please let me know immediately.

To upload your manuscript, log into <http://mc.manuscriptcentral.com/prsb> and enter your Author Centre, where you will find your manuscript title listed under "Manuscripts with Decisions." Under "Actions," click on "Create a Revision." Your manuscript number has been appended to denote a revision.

You will be unable to make your revisions on the originally submitted version of the manuscript. Instead, upload a new version through your Author Centre.

Before uploading your revised files please make sure that you have:

- 1) A text file of the manuscript (doc, txt, rtf or tex), including the references, tables (including captions) and figure captions. Please remove any tracked changes from the text before submission. PDF files are not an accepted format for the "Main Document".
- 2) A separate electronic file of each figure (tiff, EPS or print-quality PDF preferred). The format should be produced directly from original creation package, or original software format. Please note that PowerPoint files are not accepted.
- 3) Electronic supplementary material: this should be contained in a separate file from the main text and the file name should contain the author's name and journal name, e.g `authorname_procb_ESM_figures.pdf`

All supplementary materials accompanying an accepted article will be treated as in their final form. They will be published alongside the paper on the journal website and posted on the online figshare repository. Files on figshare will be made available approximately one week before the accompanying article so that the supplementary material can be attributed a unique DOI. Please see: <https://royalsociety.org/journals/authors/author-guidelines/>

#### 4) Data-Sharing and data citation

It is a condition of publication that data supporting your paper are made available. Data should be made available either in the electronic supplementary material or through an appropriate repository. Details of how to access data should be included in your paper. Please see <https://royalsociety.org/journals/ethics-policies/data-sharing-mining/> for more details.

If you wish to submit your data to Dryad (<http://datadryad.org/>) and have not already done so you can submit your data via this link <http://datadryad.org/submit?journalID=RSPB&manu=RSPB-2019-0681.R1> which will take you to your unique entry in the Dryad repository.

If you have already submitted your data to dryad you can make any necessary revisions to your dataset by following the above link.

5) For more information on our Licence to Publish, Open Access, Cover images and Media summaries, please visit <https://royalsociety.org/journals/authors/author-guidelines/>.

Once again, thank you for submitting your manuscript to Proceedings B and I look forward to receiving your final version. If you have any questions at all, please do not hesitate to get in touch.

Sincerely,

Dr Sarah Brosnan  
Editor, Proceedings B  
<mailto:proceedingsb@royalsociety.org>

Associate Editor Board Member: 1

Comments to Author:

Thank you very much for making substantial changes to your article. The two reviewers who reviewed your original submission kindly reviewed this revision. Both agreed that your article was much improved and recommended it for publication. I concur. To finalize your article for acceptance, can you please enhance the clarity of your figure captions as noted by one of the reviewers. Additionally, for full clarity, can you please also provide your (analysis) code, either as supplementary materials or shared via a repository such as GitHub. With those additions, it would be my pleasure to recommend your article for publication in Proc R Soc B.

Reviewer(s)' Comments to Author:

Referee: 2

Comments to the Author(s)

The authors have thoughtfully revised the manuscript and I have no further comments.

Referee: 1

Comments to the Author(s)

The authors have done a reasonably satisfactory job of addressing both my concerns, and the concerns of reviewer #2. Their clarifications do help, though I think it would be useful to move

some of the information in the supplementary materials to the main text – I am thinking especially of Figure S2 and its accompanying information, which are an important part of the reason this paper is of broad interest.

If the authors are given another chance to revise, then I would also encourage them to work on clarifying their figure captions. These are still lacking much, if any, biology, and largely do not address the all-important question of what the figure means. Thanks to the clarifications in the text it is now easier to figure out, but a one-sentence description of the biology in each of their figure captions would go a long way. More specific axis titles might also help – e.g. distance from what? Probability of what? It should not be necessary to hunt through the text to figure this out.

As I mentioned in my comments to the editor during the first round of reviews, I believe that this paper should also be evaluated by someone with greater expertise in the statistical techniques the authors are using. If reviewer #2 has such expertise, wonderful, but I myself do not feel qualified to say with any authority that the clustering and network modularity analyses were handled appropriately.

That said, this is an interesting paper with important ramifications for our understanding of a phenomenon – HSM – that has received much attention in the cognition and evolution literatures. I thus feel that Proceedings B is an appropriate home for it, and would recommend acceptance.

## Decision letter (RSPB-2019-0681.R2)

20-Jun-2019

Dear Ms Morrison

I am pleased to inform you that your manuscript entitled "Hierarchical Social Modularity in Gorillas" has been accepted for publication in Proceedings B.

You can expect to receive a proof of your article from our Production office in due course, please check your spam filter if you do not receive it. PLEASE NOTE: you will be given the exact page length of your paper which may be different from the estimation from Editorial and you may be asked to reduce your paper if it goes over the 10 page limit.

If you are likely to be away from e-mail contact please let us know. Due to rapid publication and an extremely tight schedule, if comments are not received, we may publish the paper as it stands.

If you have any queries regarding the production of your final article or the publication date please contact [procb\\_proofs@royalsociety.org](mailto:procb_proofs@royalsociety.org)

Your article has been estimated as being 9 pages long. Our Production Office will be able to confirm the exact length at proof stage.

### Open Access

You are invited to opt for Open Access, making your freely available to all as soon as it is ready for publication under a CCBY licence. Our article processing charge for Open Access is £1700.

Corresponding authors from member institutions

(<http://royalsocietypublishing.org/site/librarians/allmembers.xhtml>) receive a 25% discount to these charges. For more information please visit <http://royalsocietypublishing.org/open-access>.

#### Paper charges

An e-mail request for payment of any related charges will be sent out shortly. The preferred payment method is by credit card; however, other payment options are available.

#### Electronic supplementary material:

All supplementary materials accompanying an accepted article will be treated as in their final form. They will be published alongside the paper on the journal website and posted on the online figshare repository. Files on figshare will be made available approximately one week before the accompanying article so that the supplementary material can be attributed a unique DOI.

Thank you for your fine contribution. On behalf of the Editors of the Proceedings B, we look forward to your continued contributions to the Journal.

Sincerely,

Editor, Proceedings B  
mailto: [proceedingsb@royalsociety.org](mailto:proceedingsb@royalsociety.org)

# Appendix A

## Associate Editor

Comments to Author:

I have been fortunate to receive reviews of your article from two experts in the field. Both reviewers reported that your study was strong and should be of interest to a broad audience - ideal for the readership of this journal. I agree. However, both reviewers also requested that you provide greater clarity in your description of your analytical approach and your interpretation of them. I agree that this will enhance your article and make it more accessible to a wide readership and that doing so will make it a stronger contribution to this journal.

*Extensive additions to the methods section to make them more accessible, and clarification within the results section*

## Referee: 1

Comments to the Author(s)

This manuscript empirically tests the idea that western gorillas, like humans, some other primates (e.g. hamadryas baboons, geladas) elephants, and whales, live in a hierarchically nested, sometimes-kin-structured social organization. It addresses a very interesting question about these understudied animals, and makes good use of the extensive bai data from multiple field sites.

The introduction to the paper is extremely well written. It is clear and concise and is a pleasure to read. I have only two comments/questions about the introduction. First, I am unclear on what the justification is for claiming that HSM is 'uniquely human' if we already know that it occurs in other primates, whales, and elephants. Is this claim perhaps outdated, written before we knew that it occurred in these other taxa? Please clarify. The answer to this is important, as I think it fundamentally affects whether this paper is best suited for Proceedings B, or some other journal.

*Hierarchical social modularity is not unique to humans, but rather what has been suggested in the past is that the form of hierarchical social modularity observed in humans is qualitatively different to that in other species. Humans show a greater number of levels of social structure and cooperation between large numbers of unrelated individuals. This was thought to be evolutionarily distinct from HSM in other species, as no other apes showed the behaviour, suggesting it evolved separately and was thought to have been enabled by brain expansion during hominin evolution. In the sentence: "An extreme version of the social brain narrative is that human HSM is a unique product of hominin brain evolution" We mean to communicate how human HSM was thought to be unique from HSM in other species, but can see how that can easily be misinterpreted, so have removed the word unique and added "distinct from HSM observed in other primates" (line 41-42)*

Second, I would suggest adding another sentence or two on western gorilla dispersal/social structure. For example, the term 'solitaries' comes up in the methods, but the authors did not clarify earlier that many adult males live alone. It doesn't need to be much, but for the very general readership of Proceedings B, it's best not to make any assumptions about what people do or do not know about gorillas.

*Extra information on gorilla social structure and dispersion added in lines 55-58*

Beyond the introduction, the paper needs extensive editing to make the methods and results intelligible to readers in a broad range of specialties. Relatively few Proceedings B readers

will have much, if any, familiarity with the modeling framework the authors have adopted, and it is not currently explained in a manner that makes it accessible to anyone who is not already intimately familiar with the analysis methods. In general, the authors need to find a way to explain the statistical modeling in a way that tells us about the biological significance. E.g., what are bifurcation heights telling us? What about bifurcation differences? Are the SR and BP association indices simply complimentary ways of analyzing the data, or is there some specific purpose to using both? What are changes in gradients/knots telling us? Those are just a few examples. The way the statistical methods—and to some degree the results—are written, they are inaccessible to anyone who does not do exactly this sort of work themselves. *Extensive additions to the methods section to make them more accessible*

I think at least part of this could be remedied by including more basic description. While I sympathize with the authors' desire to be concise, what this functionally means is that I still don't have a clear idea of what the authors are proposing this hierarchical structure looks like. How big are these second-tier associations that the authors are newly describing? *Inclusion of the number of gorilla groups, solitaries and individual gorillas in each level of social structure detected (lines 178, 182-183 and 208)*

How closely related, on average, are the males who make up the members of a group at this tier? What might tie together the males who are members of a group at this tier for the Mbeli population, if not genetic kinship? It doesn't help much to say that these are equivalent to e.g. elephant clans or baboon gangs if we don't know what those are (and again, most people won't). *Additional information lines 245-255*

The figures help only a little, if at all, since they seem to be missing captions, and a lot of the terms used in them are never really defined. As written, the biology has gotten lost underneath the numbers. *Captions now listed at end of manuscript*

I would be happy to read a revised version of this article and offer more specific comments once I have a clearer idea of what was done and what was found. I could not agree with the authors more that an unquestioned assumption that chimpanzees are always the best model for understanding human evolution, based only on their genetic relatedness, is extremely problematic. We need more studies like these to clarify where humans do, and do not, overlap with the many interesting characteristics of great ape social behavior.

## **Referee: 2**

Comments to the Author(s)

In this manuscript the authors take a network-based approach to classify the hierarchical structure of western lowland gorillas. Overall, the manuscript is well written and the analyses relatively clearly presented. The authors also take care to place their work in the broader literature, and fill an important gap in our knowledge of the evolution of hierarchical social modularity (HSM) in apes (and therefore humans). Given the sophisticated approach and thorough background/context, this should be of broad interest to the readers of Proceedings B. I only have a few comments for the authors that they should address in any resubmission:

1. Overall, the description of the network methods are short and filled with jargon. It would be

useful for the authors to clearly state what each approach brings to the table and, without using jargon, describe what each method does. For instance, the different clustering approaches in lines 100-110 could be explained more clearly. What does the “cluster\_resolution” algorithm do? What do “multiple peaks in modularity” mean for the social structure of gorillas? Some, but not all of this detail, is present in the supplementary methods. *Extensive additions to the methods section to make them more accessible.*

2. In the main text, the authors should clarify what each node in their network represents. In the main text it is unclear if each node is an individual silverback (or solitary male), or if each node in the network is a “group” or “solitary”. I had to go to the supplementary tables to figure out that it was “group” & “solitary”. For instance, in lines 130-132 they mention “silverbacks” and not “groups”. Which is it? Please be consistent. *We have now changed every use of “silverback” to “group or solitary male”. We had used silverback to be more concise when discussing silverback male gorillas and their associated groups as well as solitary silverback males but can see that this is likely to cause unnecessary confusion, especially in those without considerable background knowledge on gorilla social structure.*

3. Lines 121-124: There is too little detail in the main methods here about the kinship coefficients and models. These details are in the SI, but should be moved here. For instance, your binarization of “related” ( $r > 0.2$ ) vs. “unrelated” ( $r < 0.2$ ), should be clearly explained in the main text. The relatedness analysis/results in Lines 193-195 are unclear. What is the predictor and what is the outcome variable? What is the “membership in the higher tier modules” and what about lower tiers?

*Lines 158-163 to provide more information on kinship methods.  
Extra clarification added to results in lines 236-241*

4. Lines 149-152 (and elsewhere). I don't think that Kendall's rank correlation is an appropriate statistic here since the two vectors of association indices are not independent. A better approach would be to use a Mantel's test, which accounts for the interdependence of association indices in a matrix.

*Yes a Mantel's test looks like a better statistic to use. We have therefore reanalysed the data using a mantels test to demonstrate consistency between time periods (lines 191-194) and consistency between same day presence vs presence within 100m (supplementary information)*

5. It would be useful to include comparisons to other primates with modular societies, like golden snub-nosed monkeys, geladas (the g3 level is similar to gelada "teams"), and uakaris. *Baboons and now gelada social levels are directly compared with those detected in gorillas here (lines 217-219). There are such a large number of primate species showing modular societies that we don't want to list them all but have instead added an extra sentence guiding the reader to a paper that lists all primate modular societies (line 261-262).*

6. This is probably due to the manuscript submission system, but there were no figure captions in the manuscript or online. This made it difficult to interpret the figures. *Captions now listed at end of manuscript*
